# Supplementary material for: Targeting UBR5 inhibits postsurgical breast cancer lung metastases mediated by CDC73 and p53
Source: Research Square preprint supplement (doi:10.21203/rs.3.rs-2378704/v1), 2022-12-21
Supplement: Supplementary file 1 [file 1bfd91b10ca44912473e3c22.pdf]

**Supplemental Table 1: RT-PCR primer list**

| Gene name | Species | Forward Sequence        | Reverse Sequence         |
|-----------|---------|-------------------------|--------------------------|
| Gapdh     | Mouse   | ACAAC TTTGGCATTGTGGAA   | GATGCAGGGATGATGTTCTG     |
| Ubr5      | Mouse   | CAATCACGCCGCGTTTCTT     | GTCCTTCCTGGCCTAGAGGT     |
| Cdc73     | Mouse   | GGGGAAGCATCAACATCAGCA   | GCTCTTTT GACTTGAGTAGACCG |
| Parp-1    | Mouse   | ACACCACAAAACCTCAGCCA    | ACAAACCACAAACAACCGGC     |
| Pdgfrb    | Mouse   | TGTGCAGTTGCCTTACGACT    | CGCTACTTCTGGCTGTGCGAT    |
| Lama3     | Mouse   | GGCTACAGCAAGTCAGTCCA    | CCGATCACCACACTGTGCGAT    |
| Areg      | Mouse   | GCCATCATCCTCGCAGCTAT    | ATGTCATTTCCGGTGTGGCT     |
| Itga2     | Mouse   | TTAGATTCCCAGCGCAGAC     | TCACTTGAAGGCCCGGAAAA     |
| Mylk      | Mouse   | CTGGGTTTCCAAGAGAGCCTTTA | CCTTCTTTGACGCAGAGGTTC    |
| Ecm1      | Mouse   | GAACAAAGAGAAGTGCAGCCCC  | GGCAGGCGGGTCTATTTCTT     |
| Vimentin  | Mouse   | TCCACACGCACCTACAGTCT    | CCGAGGACCGGGTCACATA      |
| GAPDH     | Human   | GAAGGTGAAGGTCGGAGTCA    | TGGAATCATATTGGAACATGT    |
| UBR5      | Human   | CACCTTAGGAAGCCGCTGGA    | CGATCCCCTCCTCTCCGAAT     |
